# Supplementary material for: Thermal property of an aggregation-induced emission fluorophore that forms metal–ligand complexes with Zn(ClO4)2 of salicylaldehyde azine-functionalized polybenzoxazine
Source: Royal Society of Chemistry journal article supplement (doi:10.1039/c5ra09409g), 2015-01-01
Supplement: c5ra09409g1.pdf [file c5ra09409g1.pdf]

## Supporting Information for

### **Thermal Property and Aggregation-Induced Emission Fluorophore That Forms Metal–Ligand Complexes with $\text{Zn}(\text{ClO}_4)_2$ of Salicylaldehyde Azine–Functionalized Polybenzoxazine**

**Mohamed Gamal Mohamed,<sup>a</sup> Ruey-Chorng Lin,<sup>a</sup> Jia-Huei Tu,<sup>a</sup> Fang-Hsien Lu,<sup>a</sup> Jin-Long Hong,<sup>a</sup> Kwang-Un Jeong,<sup>c</sup> Chih-Feng Wang,<sup>d</sup> and Shiao-Wei Kuo<sup>a,b,\*</sup>**

<sup>a</sup>Department of Materials and Optoelectronic Science, Center for Functional Polymers and Supramolecular Materials, National Sun Yat-Sen University, Kaohsiung, Taiwan

E-mail: [kuosw@faculty.nsysu.edu.tw](mailto:kuosw@faculty.nsysu.edu.tw)

<sup>b</sup>Department of Medicinal and Applied Chemistry, Kaohsiung Medical University, Kaohsiung, Taiwan.

<sup>c</sup>Department of Polymer-Nano Science and Technology, Chonbuk National University, Jeonju, Korea

<sup>d</sup>Department of Materials Science and Engineering, I-Shou University, Kaohsiung, Taiwan

\*To whom correspondence should be addressed

E-mail: [kuosw@faculty.nsysu.edu.tw](mailto:kuosw@faculty.nsysu.edu.tw)

TEL./FAX: 886-7-5254099

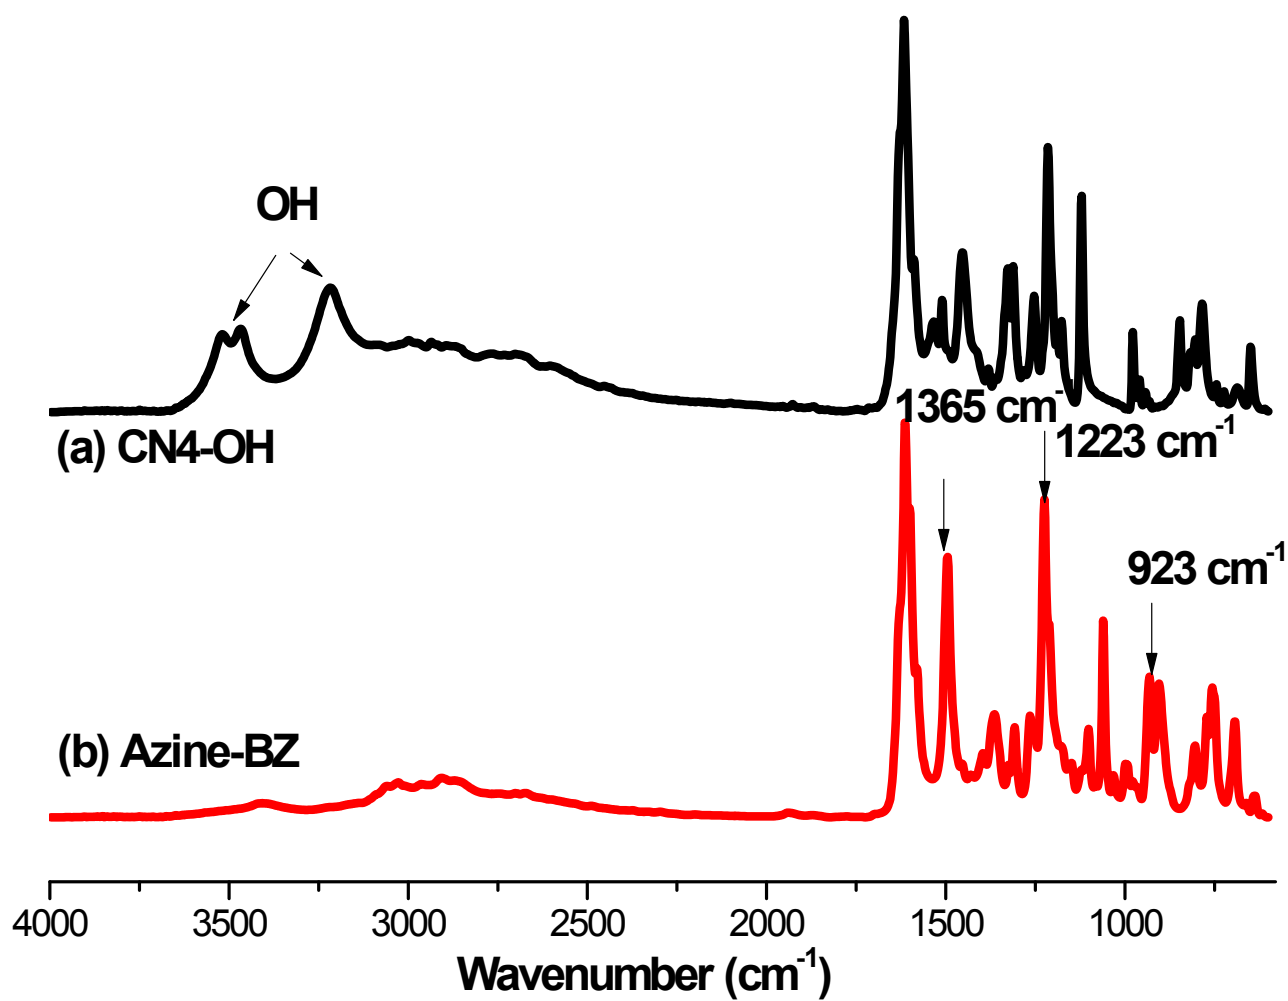

Figure S1: FT-IR spectra of (a) CN4OH, and (b) Azine-BZ at room temperature.

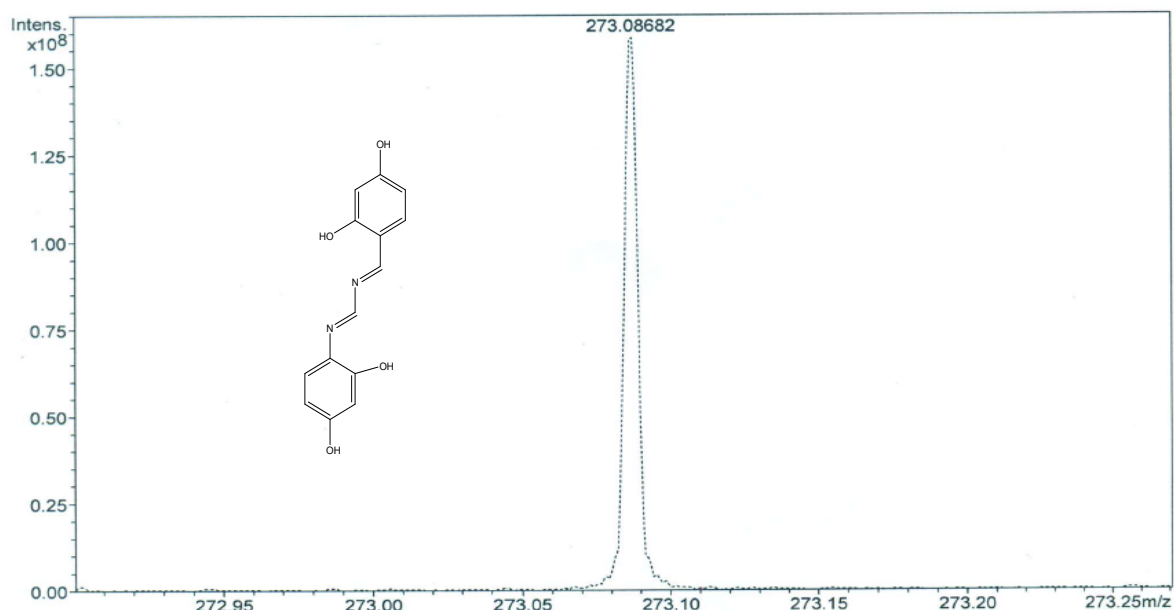

Figure S2: High resolution FT-MS of CN4OH.

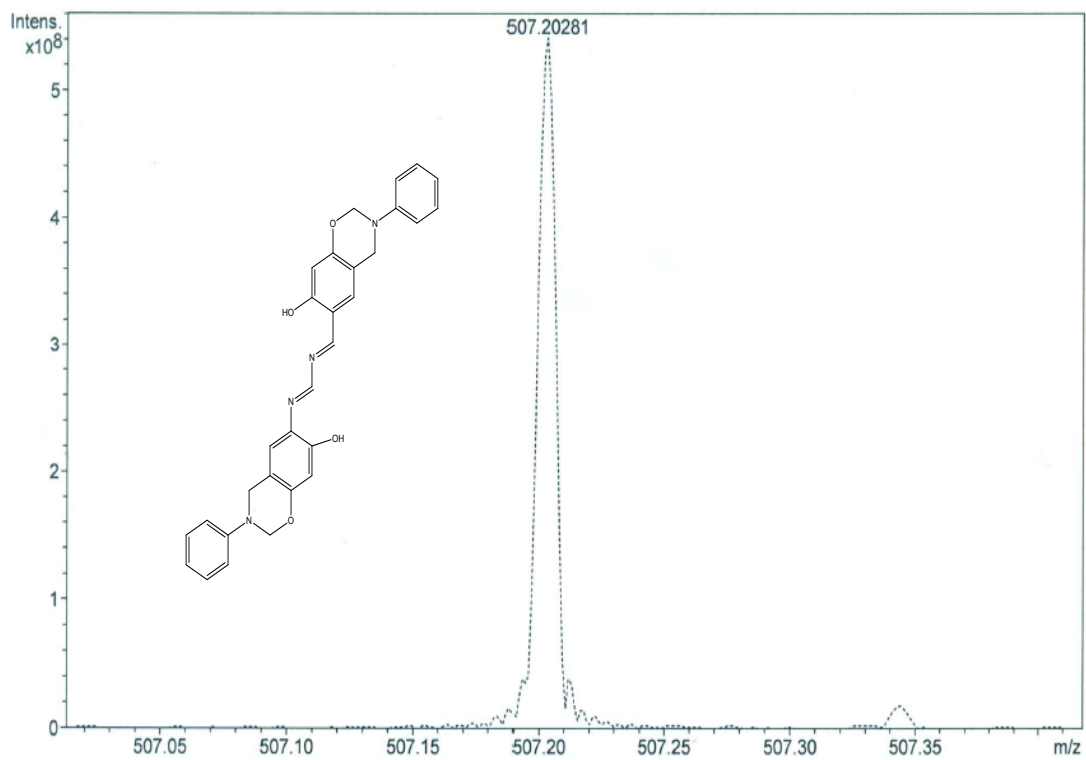

Figure S3: High resolution FT-MS of Azine-BZ.

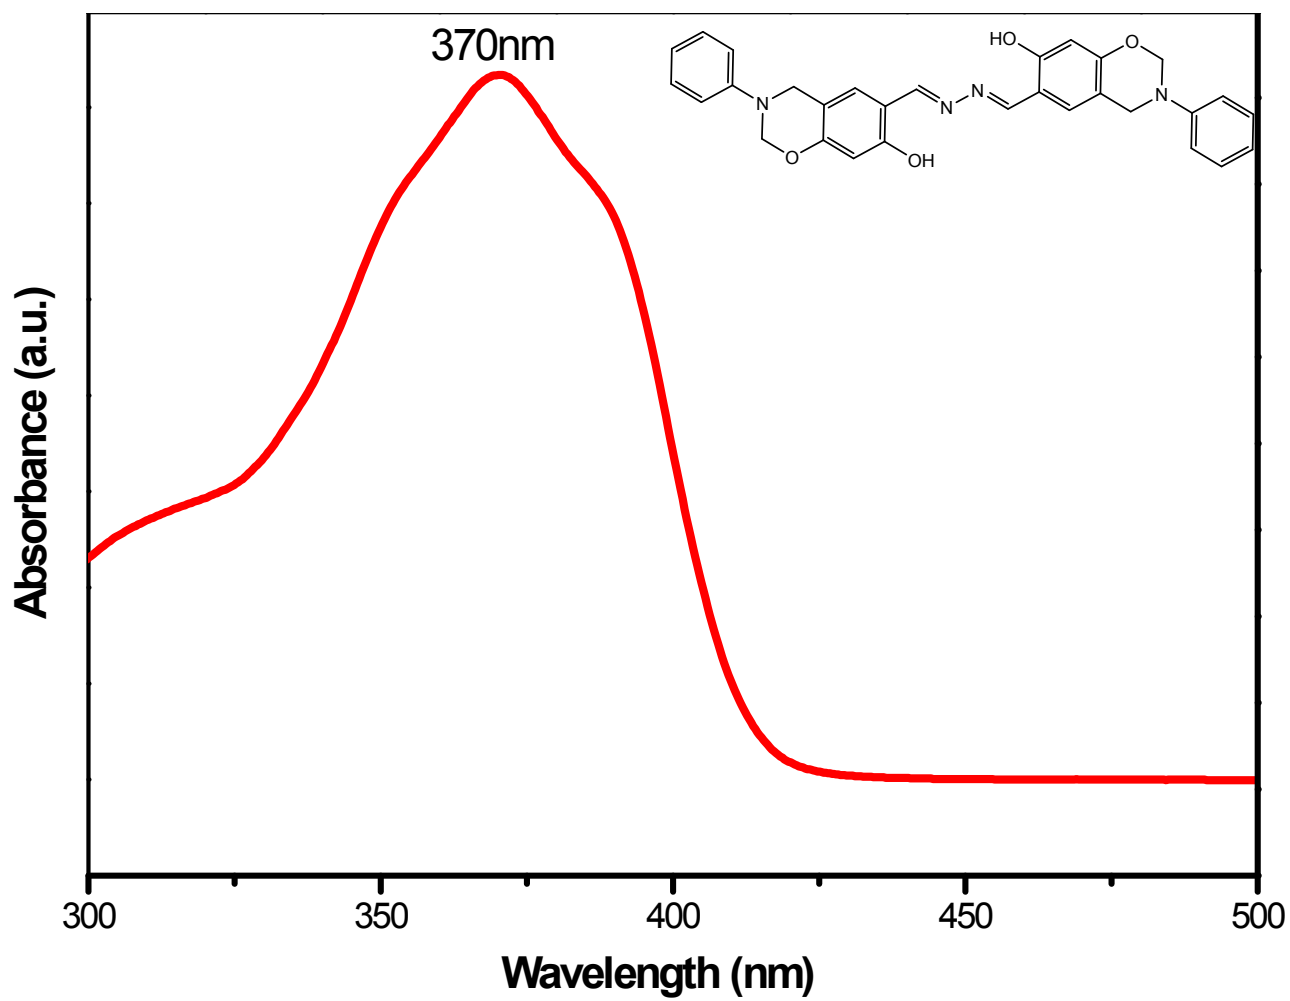

Figure S4: Uv-vis spectra of Azine-BZ ( $1.0 \times 10^{-4}$  mol L<sup>-1</sup>) in THF solution.

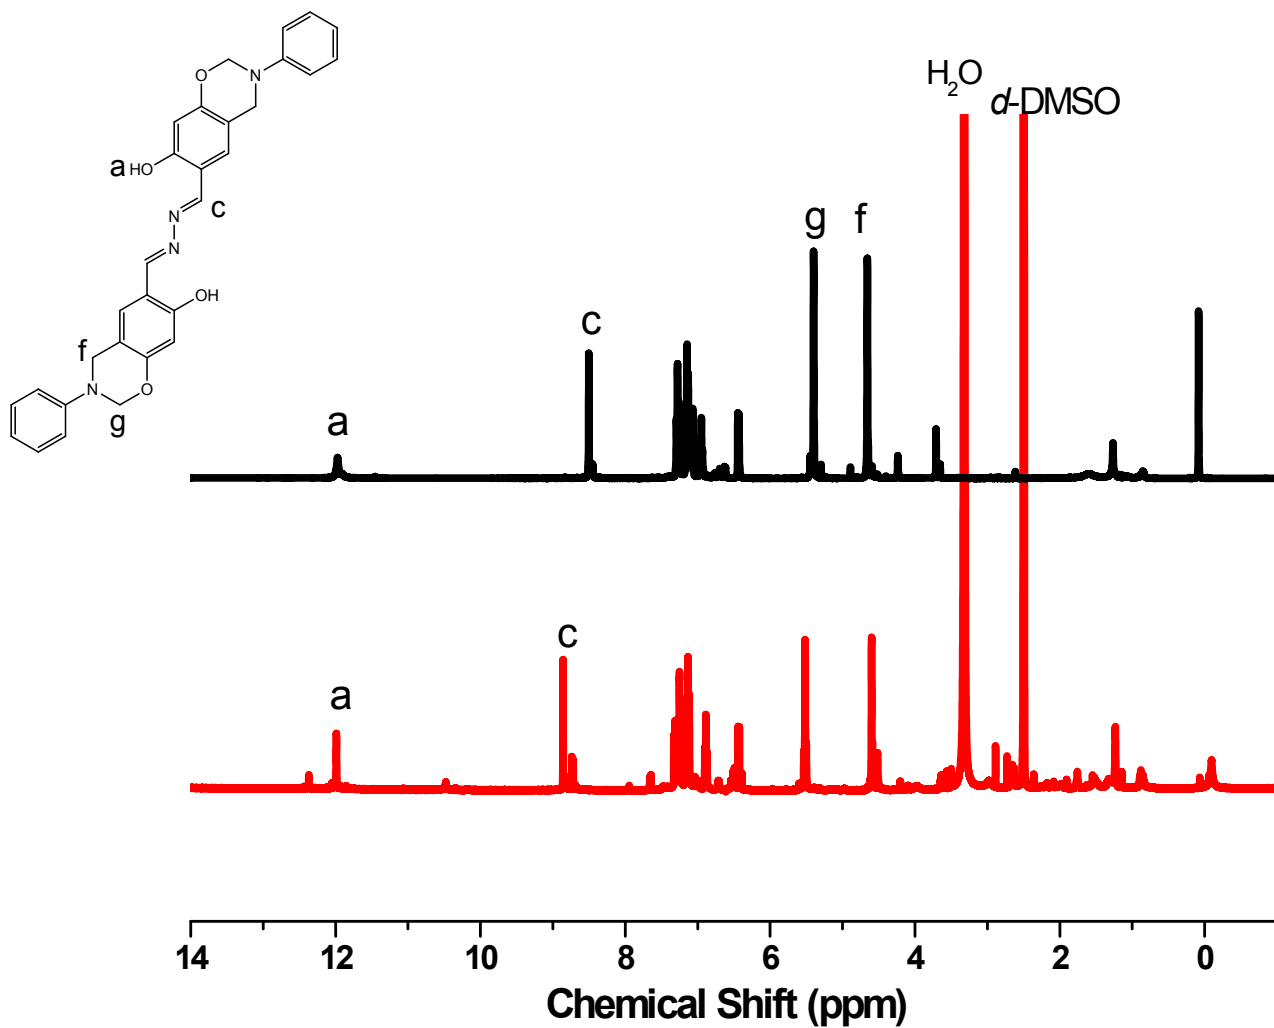

Figure S5: <sup>1</sup>H NMR spectra of (a) pure Azine-BZ at room temperature and (b) pure Azine-BZ thermal curing at 150 °C.
